# Supplementary material
Source: PubMed Central journal article supplement (PMC2614725)
Supplement: 0801725105_0801725105SI.pdf [file 0801725105_0801725105SI.pdf]

# Supporting Information

Revilla and Wiegand 10.1073/pnas.0801725105

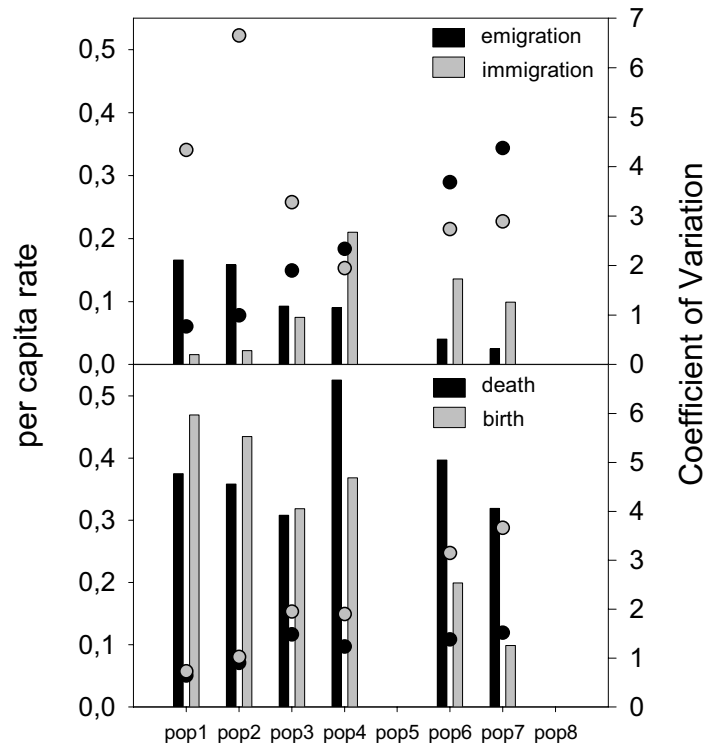

**Fig. S1.** Yearly per capita emigration, immigration, death, and birth rates for each of the local populations (bars) and their corresponding coefficients of variation (dots). The first three populations (pop1–pop3) are located inside a protected area and behave as sources; the rest are outside and behave as sinks (two potentially sink populations, pop5 and pop8, tend to be empty because they are far from the other populations and at the edge of the landscape).

**Table S1. Analysis of sensitivity of metapopulation growth rate to movement and demographic parameters**

| Model parameter                                        | Symbol              | Range explored                  | Standardized parameter estimate | $sr^2$ (type II) | Ranking |
|--------------------------------------------------------|---------------------|---------------------------------|---------------------------------|------------------|---------|
| <b>Survival and reproduction</b>                       |                     |                                 |                                 |                  |         |
| Mortality of cubs inside N.P.                          | $M_{CNP}$           | 0.40–0.60                       | –0.435***                       | 0.189            | 2       |
| Increase in cub mortality outside N.P.                 | $\Delta M_c$        | 0–0.10                          | –0.015***                       | <0.001           | 10      |
| Mortality of subadults inside N.P.                     | $M_{SNP}$           | 0.15–0.35                       | –0.300***                       | 0.088            | 4       |
| Increase in subadults mortality outside N.P.           | $\Delta M_s$        | 0–0.20                          | –0.026***                       | <0.001           | 9       |
| Mortality of dispersers inside N.P.                    | $M_{dNP}$           | 0.20–0.60                       | –0.152***                       | 0.023            | 5       |
| Increase in dispersers mortality outside N.P.          | $\Delta M_d$        | 0–0.40                          | –0.121***                       | 0.015            | 7       |
| Mortality of residents inside N. P.                    | $M_{rNP}$           | 0.05–0.25                       | –0.696***                       | 0.481            | 1       |
| Increase in residents mortality outside N.P.           | $\Delta SM_r$       | 0–0.40                          | –0.151***                       | 0.023            | 6       |
| Probability of reproduction                            | $b_n$               | 0.5–0.7                         | 0.342***                        | 0.117            | 3       |
| Probability of reproduction in best areas              | $\Delta b_b$        | 0–0.2                           | 0.116***                        | 0.013            | 8       |
| <b>Individual movement behavior</b>                    |                     |                                 |                                 |                  |         |
| <b>Motion capacity</b>                                 |                     |                                 |                                 |                  |         |
| Average number of steps per day                        | $f(\alpha)^\dagger$ | 16.5–21.7                       | 0.017***                        | <0.001           | 1       |
| Autocorrelation in dispersal habitat                   | $\theta_d$          | 0.23–0.29                       | 0.008*                          | <0.001           | 3       |
| Bimodal distribution of turning angles                 | $\delta$            | 0.59–0.72                       | [–0.004]                        | —                | —       |
| Long-distance threshold                                | $L$                 | 5 ( $p = 0.1$ )–7 ( $p = 0.1$ ) | [0.005]                         | —                | —       |
| Increase in autocorrelation in long-distance movements | $\Delta\theta_l$    | 0.24–0.30                       | [–0.005]                        | —                | —       |
| <b>Navigation capacity</b>                             |                     |                                 |                                 |                  |         |
| Fragmentation threshold                                | $N_d$               | 4 ( $p = 0.1$ )–6 ( $p = 0.1$ ) | [–0.004]                        | —                | —       |
| Increase in autocorrelation in fragmented areas        | $\Delta\theta_f$    | 0.09–0.11                       | [–0.004]                        | —                | —       |
| Avoidance of open habitat                              | $\beta$             | 0.70–0.90                       | [0.007]                         | —                | —       |
| Probability to return to dispersal habitat             | $\gamma$            | 0.08–0.10                       | –0.010**                        | <0.001           | 2       |

Standardized parameter estimates give information on the relative strength of the impact of each parameter on  $\lambda$  and can be compared between parameters, as given in the ranking of importance. \*,  $P < 0.05$ ; \*\*,  $P < 0.01$ ; \*\*\*,  $P < 0.001$ ;  $sr^2$ , squared semipartial correlation; adj.  $r^2$ , for the full model 0.951. N.P., national park.

$^\dagger\alpha$  ranged between 0.00038 and 0.0002 (see *Model Parameterization* in [SI Appendix](#))

## Other Supporting Information Files

[SI Appendix](#)
